# Supplementary material for: The neoepitope landscape of breast cancer: implications for immunotherapy
Source: Springer Nature journal article supplement (doi:10.1186/s12885-019-5402-1), 2019-03-04
Supplement: MOESM1 [file 16524488]

**Table S1. Number of patients for breast cancer subtype in the TCGA dataset according to IHC status.** Sample sizes of the initial dataset, and for samples that were able to be included at each stage (mutation burden calling, neoepitope load estimation, and then gene expression analysis), are reported for each of the three breast cancer subtype categories (ER/PR(+)HER-2(-), HER-2(+), TNBC).

| <b>Breast cancer subtype</b>                                                                     | <b>Sample size</b>     |                        |                        |
|--------------------------------------------------------------------------------------------------|------------------------|------------------------|------------------------|
|                                                                                                  | <b>Mutation burden</b> | <b>Neoepitope load</b> | <b>Expression data</b> |
| <b>ER/PR(+)HER-2(-)</b><br>ER(+) only, ER(+)/PR(+),<br>PR(+) only, HER-2(-) for all              | 630                    | 586                    | 583                    |
| <b>HER-2(+)</b><br>HER-2(+) only,<br>ER(+)/PR(+)/HER-2(+),<br>ER(+)/HER-2(+), PR(+)/HER-<br>2(+) | 141                    | 138                    | 138                    |
| <b>TNBC</b><br>ER(-)/PR(-)/HER-2(-)                                                              | 99                     | 93                     | 92                     |
| <b>Total</b>                                                                                     | 870                    | 817                    | 721                    |
