# Supplementary material for: The neoepitope landscape of breast cancer: implications for immunotherapy
Source: Springer Nature journal article supplement (doi:10.1186/s12885-019-5402-1), 2019-03-04
Supplement: MOESM2 [file 16524488]

**Table S2. Patient and tumor characteristics.** Demographic data for patients and clinical measurements for tumors are included in the table below for each category of breast cancer.

| Characteristics          | ER/PR(+)HER-2(-) |             | HER-2(+)   |             | TNBC      |             | Total      |
|--------------------------|------------------|-------------|------------|-------------|-----------|-------------|------------|
|                          | n                | %           | n          | %           | n         | %           |            |
| <b>Age (years)</b>       |                  |             |            |             |           |             |            |
| <50                      | 167              | 26.5        | 35         | 25.0        | 37        | 37          |            |
| ≥50                      | 462              | 73.3        | 106        | 75.2        | 62        | 63          |            |
| NA                       | 1                | 0.1         | 0          | 0           | 0         | 0           |            |
| <b>Tumor size (cm)</b>   |                  |             |            |             |           |             |            |
| T1                       | 166              | 26.3        | 27         | 19.1        | 22        | 23          |            |
| T2                       | 360              | 57.1        | 94         | 67.7        | 65        | 65          |            |
| T3                       | 86               | 13.7        | 14         | 10.0        | 10        | 10          |            |
| T4                       | 17               | 2.6         | 6          | 4.3         | 2         | 2.0         |            |
| NA                       | 1                | 0.1         | 0          | 0           | 0         | 0           |            |
| <b>Lymph node status</b> |                  |             |            |             |           |             |            |
| N0                       | 281              | 44.6        | 59         | 41.8        | 67        | 68          |            |
| N1                       | 217              | 34.4        | 47         | 33.3        | 21        | 21          |            |
| N2                       | 70               | 11.1        | 20         | 14.2        | 7         | 7           |            |
| N3                       | 48               | 7.6         | 14         | 10.0        | 4         | 4           |            |
| NX                       | 14               | 2.3         | 1          | 0.7         | 0         | 0           |            |
| <b>Tumor Stage</b>       |                  |             |            |             |           |             |            |
| Stage I                  | 108              | 17.2        | 16         | 11.3        | 17        | 17          |            |
| Stage II                 | 349              | 55.4        | 83         | 58.9        | 65        | 65          |            |
| Stage III                | 146              | 23.2        | 37         | 26.2        | 14        | 14          |            |
| Stage IV                 | 12               | 2.0         | 3          | 2.1         | 2         | 2           |            |
| NA                       | 15               | 2.4         | 2          | 1.4         | 2         | 2           |            |
| <b>Total</b>             | <b>630</b>       | <b>72.4</b> | <b>141</b> | <b>16.2</b> | <b>99</b> | <b>11.4</b> | <b>870</b> |
