# Supplementary material for: The neoepitope landscape of breast cancer: implications for immunotherapy
Source: Springer Nature journal article supplement (doi:10.1186/s12885-019-5402-1), 2019-03-04

**Figure S1. Frequently mutated genes in TCGA breast cancer data.** Here we show the most mutated genes for: (A) ER/PR(+)HER-2(-) breast cancers, (B) HER-2(+) breast cancers, and (C) TNBC. The % Mutant indicates the percentage of samples with a mutation in the annotated particular gene.

A.

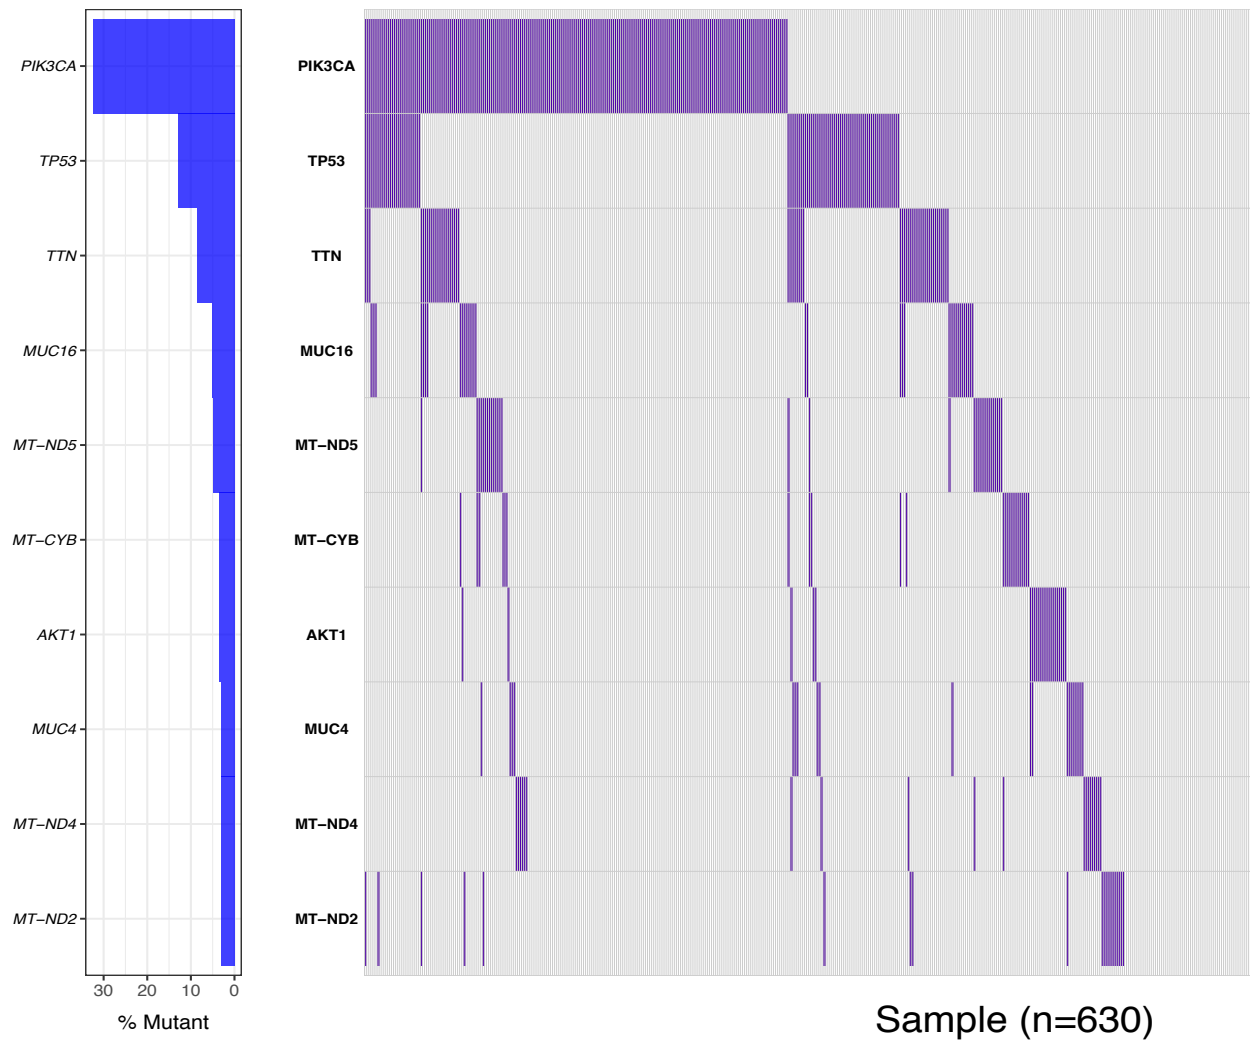

B.

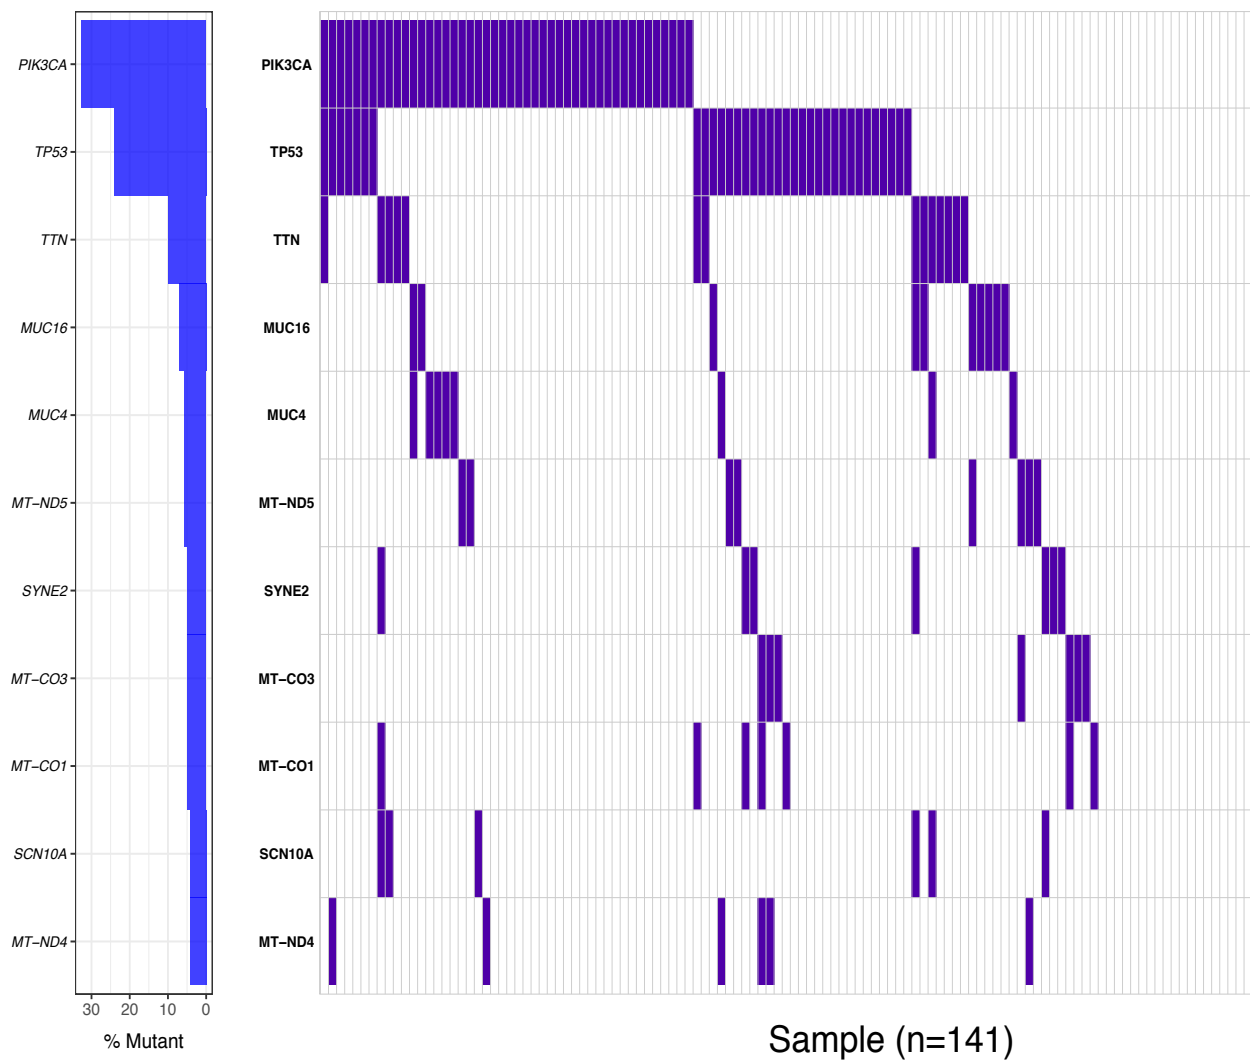

C.

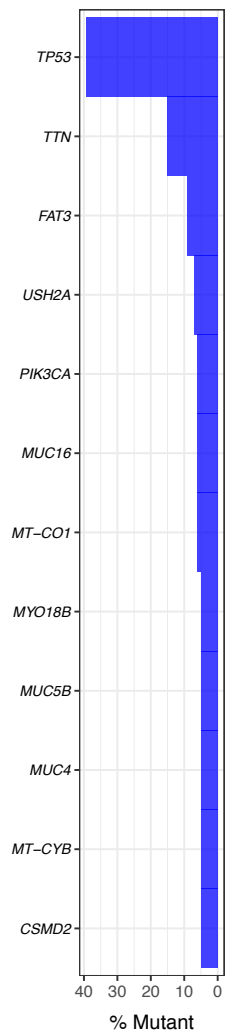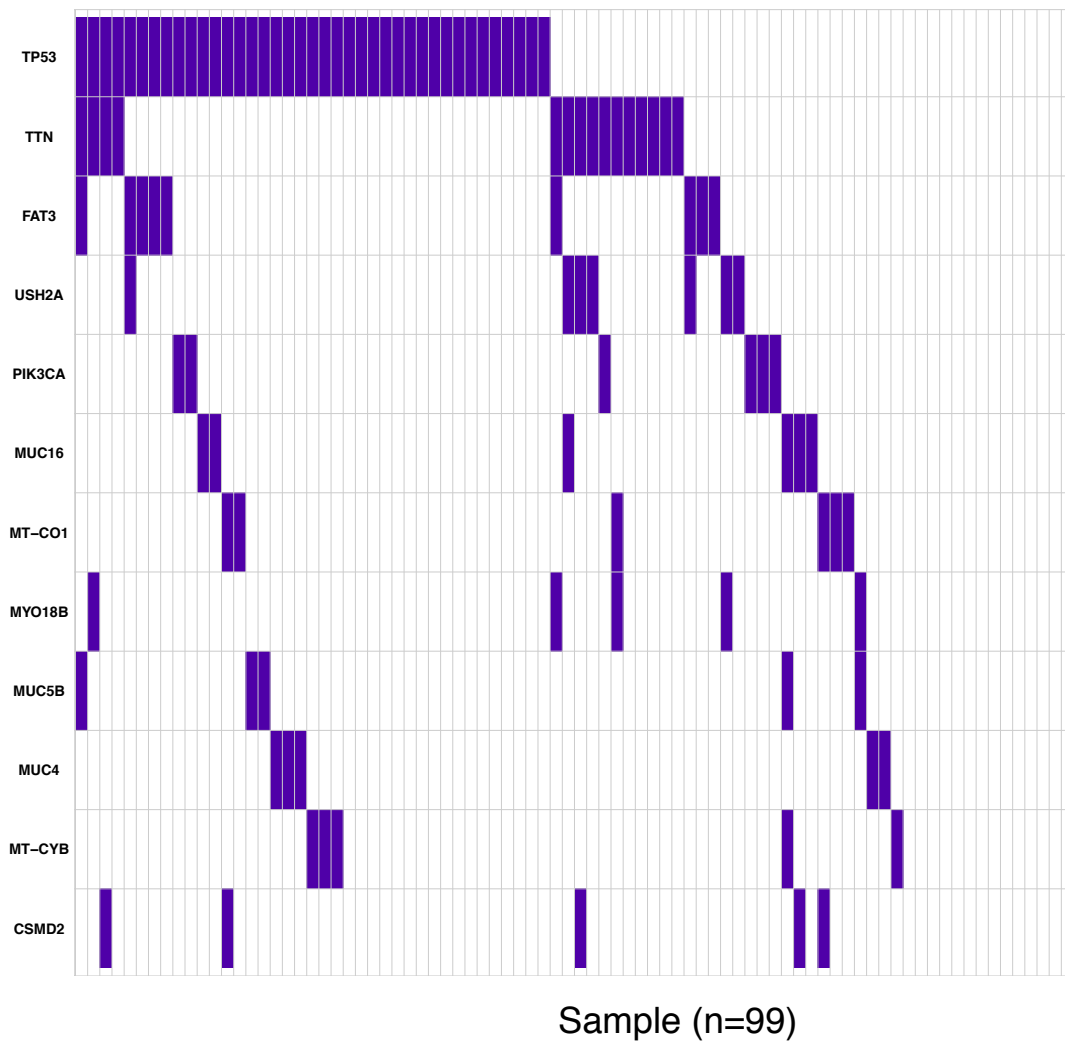

Supplement: MOESM3 [file 16524488]
