# Supplementary material for: The neoepitope landscape of breast cancer: implications for immunotherapy
Source: Springer Nature journal article supplement (doi:10.1186/s12885-019-5402-1), 2019-03-04

**Figure S3. Correlation of number of potential binding neoepitopes with number of nonsynonymous mutations.** The number of potential binding neoepitopes (IEDB score  $\leq$  500) are highly correlated with the number of nonsynonymous mutations for all three subtypes of breast cancer. In all the plots, a linear regression model is used to fit the data; the fitted line is shown in red and 95% CIs are shown as grey shaded area around the line.

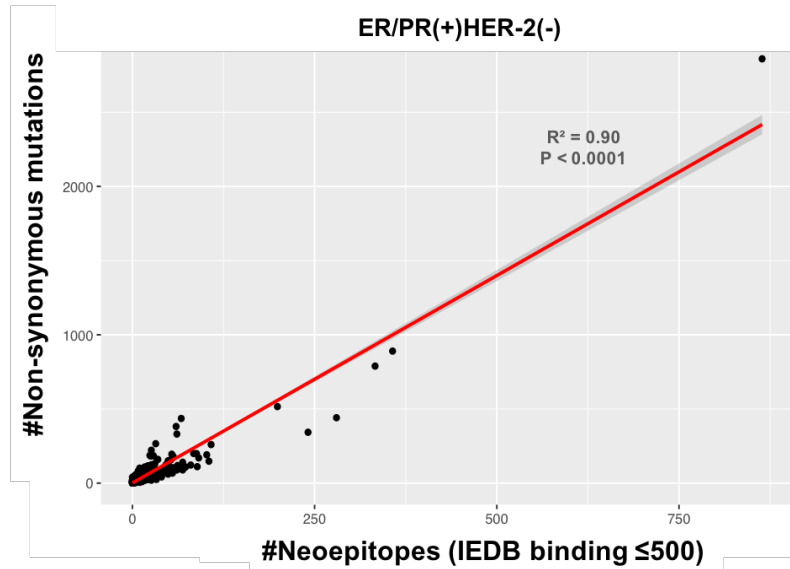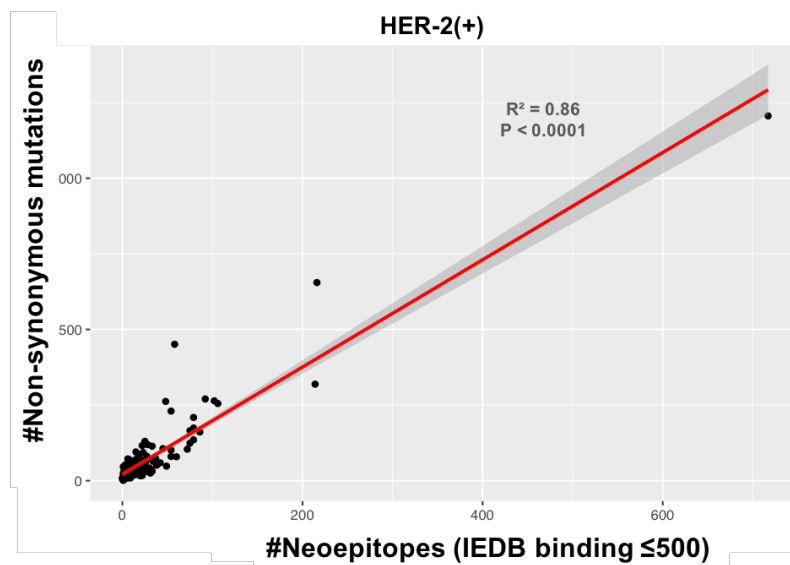

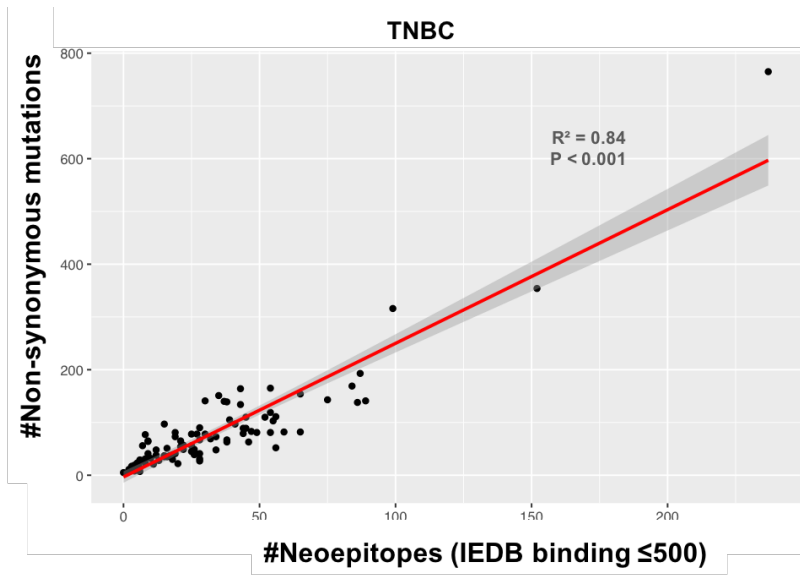

Supplement: MOESM5 [file 16524488]
