# Supplementary material for: The neoepitope landscape of breast cancer: implications for immunotherapy
Source: Springer Nature journal article supplement (doi:10.1186/s12885-019-5402-1), 2019-03-04

**Figure S6. Correlation of number of potential binding neoepitopes with number of expressed (FPKM $\geq$ 2) neoepitopes.** The number of potential binding neoepitopes (IEDB score  $\leq$  500) are highly correlated with the number of expressed neoepitopes (FPKM $\geq$ 2) for all three subtypes of breast cancer. In all the plots a linear regression model is used to fit the data; the fitted line is shown in red and 95% CIs are shown in grey.

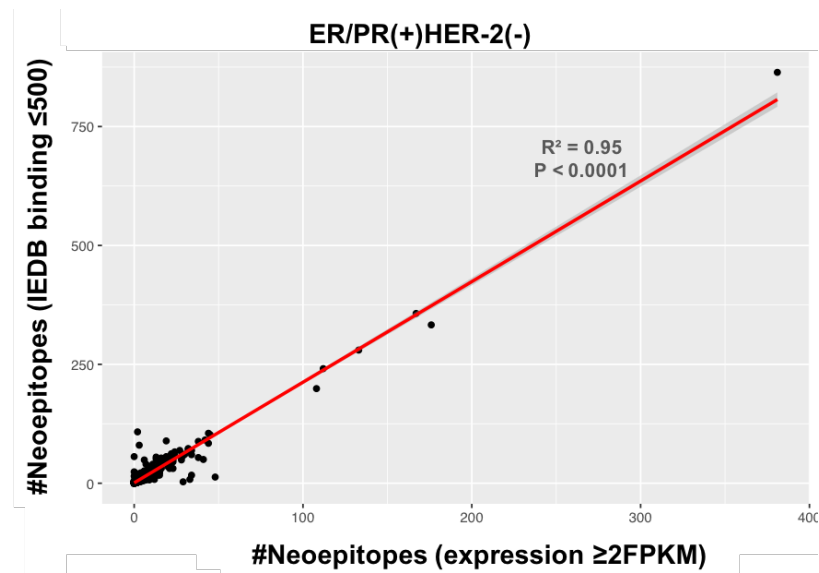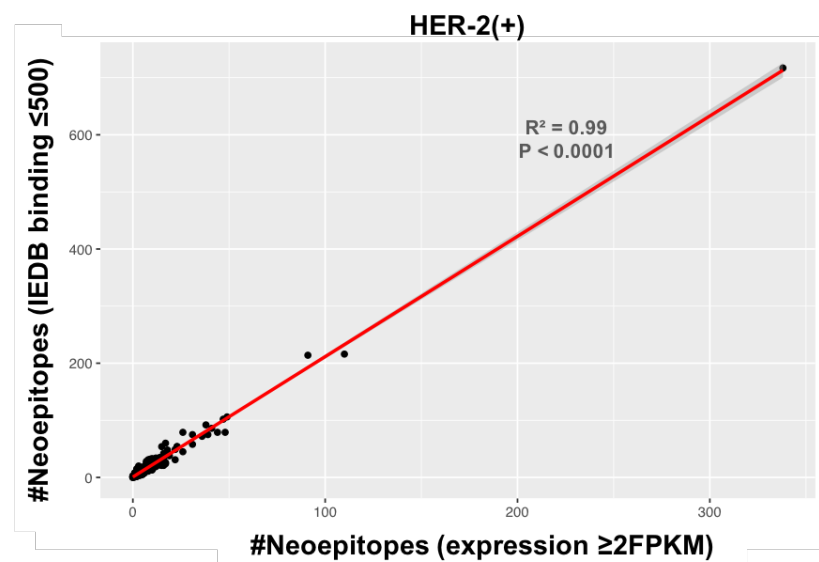

TNBC

$R^2 = 0.93$

$P < 0.001$

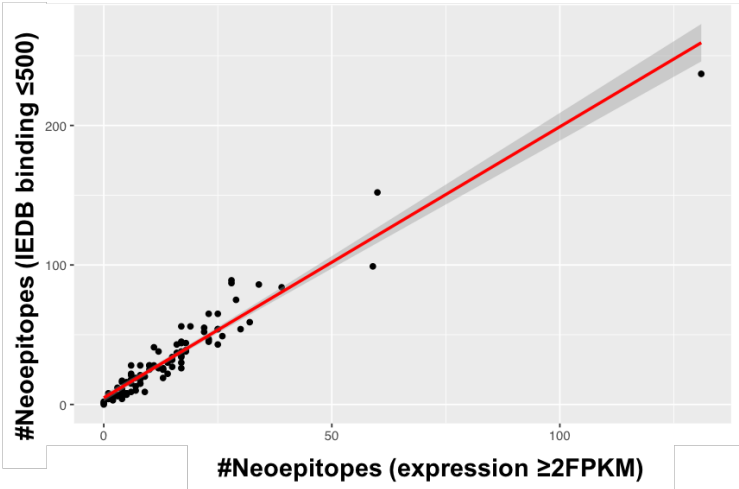

Supplement: MOESM8 [file 16524488]
