# Supplementary material for: The neoepitope landscape of breast cancer: implications for immunotherapy
Source: Springer Nature journal article supplement (doi:10.1186/s12885-019-5402-1), 2019-03-04
Supplement: MOESM10 [file 16524488]

**Table S3: Number of neopeptides predicted for HLA class I alleles in all the breast cancer samples as well as for the three subtypes.** For each allele, we also list the proportion of neopeptides for each subtype.

| Alleles     | #neopeptides(prop of neopeptides) |           |           | Total |
|-------------|-----------------------------------|-----------|-----------|-------|
|             | ER/PR(+)HER-2(-)                  | HER-2(+)  | TNBC      |       |
| HLA-A*01:01 | 181(0.79)                         | 33(0.14)  | 14(0.06)  | 228   |
| HLA-A*02:01 | 368(0.55)                         | 191(0.29) | 111(0.17) | 670   |
| HLA-A*02:06 | 18(0.72)                          | 3(0.12)   | 4(0.16)   | 25    |
| HLA-A*03:01 | 299(0.58)                         | 166(0.32) | 54(0.1)   | 519   |
| HLA-A*11:01 | 128(0.59)                         | 32(0.15)  | 57(0.26)  | 217   |
| HLA-A*23:01 | 24(0.56)                          | 5(0.12)   | 14(0.33)  | 43    |
| HLA-A*24:02 | 62(0.56)                          | 30(0.27)  | 19(0.17)  | 111   |
| HLA-A*25:01 | 1(0.33)                           | 1(0.33)   | 1(0.33)   | 3     |
| HLA-A*26:01 | 43(0.83)                          | 3(0.06)   | 6(0.12)   | 52    |
| HLA-A*29:02 | 21(0.66)                          | 2(0.06)   | 9(0.28)   | 32    |
| HLA-A*30:01 | 29(0.41)                          | 16(0.23)  | 25(0.36)  | 70    |
| HLA-A*30:02 | 13(0.68)                          | 3(0.16)   | 3(0.16)   | 19    |
| HLA-A*31:01 | 21(0.35)                          | 13(0.22)  | 26(0.43)  | 60    |
| HLA-A*32:01 | 15(0.52)                          | 5(0.17)   | 9(0.31)   | 29    |
| HLA-A*33:03 | 48(0.38)                          | 17(0.13)  | 63(0.49)  | 128   |
| HLA-A*68:01 | 102(0.58)                         | 48(0.27)  | 25(0.14)  | 175   |
| HLA-A*68:02 | 18(0.44)                          | 3(0.07)   | 20(0.49)  | 41    |
| HLA-A*74:01 | 1(0.5)                            | 0(0)      | 1(0.5)    | 2     |
| HLA-B*07:02 | 524(0.69)                         | 150(0.2)  | 81(0.11)  | 755   |
| HLA-B*08:01 | 101(0.67)                         | 32(0.21)  | 17(0.11)  | 150   |
| HLA-B*13:01 | 0(0)                              | 1(1)      | 0(0)      | 1     |
| HLA-B*13:02 | 0(0)                              | 0(0)      | 1(1)      | 1     |
| HLA-B*14:02 | 3(0.6)                            | 0(0)      | 2(0.4)    | 5     |
| HLA-B*15:01 | 140(0.68)                         | 54(0.26)  | 12(0.06)  | 206   |
| HLA-B*15:02 | 7(0.44)                           | 2(0.13)   | 7(0.44)   | 16    |
| HLA-B*15:25 | 17(0.52)                          | 2(0.06)   | 14(0.42)  | 33    |
| HLA-B*18:01 | 115(0.88)                         | 6(0.05)   | 10(0.08)  | 131   |
| HLA-B*27:02 | 1(0.03)                           | 2(0.07)   | 26(0.9)   | 29    |
| HLA-B*27:05 | 57(0.72)                          | 22(0.28)  | 0(0)      | 79    |
| HLA-B*35:01 | 74(0.53)                          | 41(0.29)  | 24(0.17)  | 139   |
| HLA-B*35:03 | 2(1)                              | 0(0)      | 0(0)      | 2     |
| HLA-B*39:01 | 11(0.37)                          | 4(0.13)   | 15(0.5)   | 30    |
| HLA-B*40:01 | 28(0.31)                          | 50(0.56)  | 11(0.12)  | 89    |

|             |          |          |          |     |
|-------------|----------|----------|----------|-----|
| HLA-B*40:02 | 45(0.69) | 7(0.11)  | 13(0.2)  | 65  |
| HLA-B*44:02 | 24(0.53) | 17(0.38) | 4(0.09)  | 45  |
| HLA-B*44:03 | 30(0.79) | 1(0.03)  | 7(0.18)  | 38  |
| HLA-B*46:01 | 0(0)     | 0(0)     | 1(1)     | 1   |
| HLA-B*48:01 | 0(0)     | 0(0)     | 1(1)     | 1   |
| HLA-B*49:01 | 1(0.5)   | 1(0.5)   | 0(0)     | 2   |
| HLA-B*50:01 | 0(0)     | 0(0)     | 1(1)     | 1   |
| HLA-B*51:01 | 8(0.73)  | 1(0.09)  | 2(0.18)  | 11  |
| HLA-B*52:01 | 0(0)     | 1(1)     | 0(0)     | 1   |
| HLA-B*53:01 | 7(0.32)  | 0(0)     | 15(0.68) | 22  |
| HLA-B*55:01 | 1(0.14)  | 2(0.29)  | 4(0.57)  | 7   |
| HLA-B*56:01 | 4(0.5)   | 1(0.13)  | 3(0.38)  | 8   |
| HLA-B*57:01 | 10(0.23) | 30(0.7)  | 3(0.07)  | 43  |
| HLA-B*58:01 | 7(0.58)  | 4(0.33)  | 1(0.08)  | 12  |
| HLA-C*01:02 | 1(1)     | 0(0)     | 0(0)     | 1   |
| HLA-C*02:02 | 34(0.67) | 17(0.33) | 0(0)     | 51  |
| HLA-C*02:09 | 1(0.17)  | 0(0)     | 5(0.83)  | 6   |
| HLA-C*03:02 | 13(0.15) | 20(0.23) | 55(0.63) | 88  |
| HLA-C*03:03 | 81(0.64) | 27(0.21) | 18(0.14) | 126 |
| HLA-C*03:04 | 57(0.34) | 73(0.43) | 39(0.23) | 169 |
| HLA-C*05:01 | 24(0.51) | 11(0.23) | 12(0.26) | 47  |
| HLA-C*06:02 | 27(0.54) | 16(0.32) | 7(0.14)  | 50  |
| HLA-C*07:01 | 93(0.78) | 12(0.1)  | 14(0.12) | 119 |
| HLA-C*07:02 | 36(0.53) | 18(0.26) | 14(0.21) | 68  |
| HLA-C*08:01 | 6(0.43)  | 0(0)     | 8(0.57)  | 14  |
| HLA-C*12:02 | 38(0.61) | 24(0.39) | 0(0)     | 62  |
| HLA-C*12:03 | 83(0.73) | 16(0.14) | 14(0.12) | 113 |
| HLA-C*14:02 | 14(0.39) | 9(0.25)  | 13(0.36) | 36  |
| HLA-C*15:02 | 17(0.47) | 6(0.17)  | 13(0.36) | 36  |
| HLA-C*16:01 | 172(0.9) | 2(0.01)  | 17(0.09) | 191 |
| HLA-C*17:01 | 1(0.33)  | 1(0.33)  | 1(0.33)  | 3   |

---
