# Supplementary material for: The neoepitope landscape of breast cancer: implications for immunotherapy
Source: Springer Nature journal article supplement (doi:10.1186/s12885-019-5402-1), 2019-03-04

**Figure S8: Distribution of neopeptides binding to HLA class I alleles in the three subtypes of breast cancer.** HLA-A and HLA-C binding alleles are seen in higher proportion in ER/PR(+)/HER-2(-) subtype, while HLA-B binding alleles are in higher proportion in HER-2(+) and TNBC subtype.

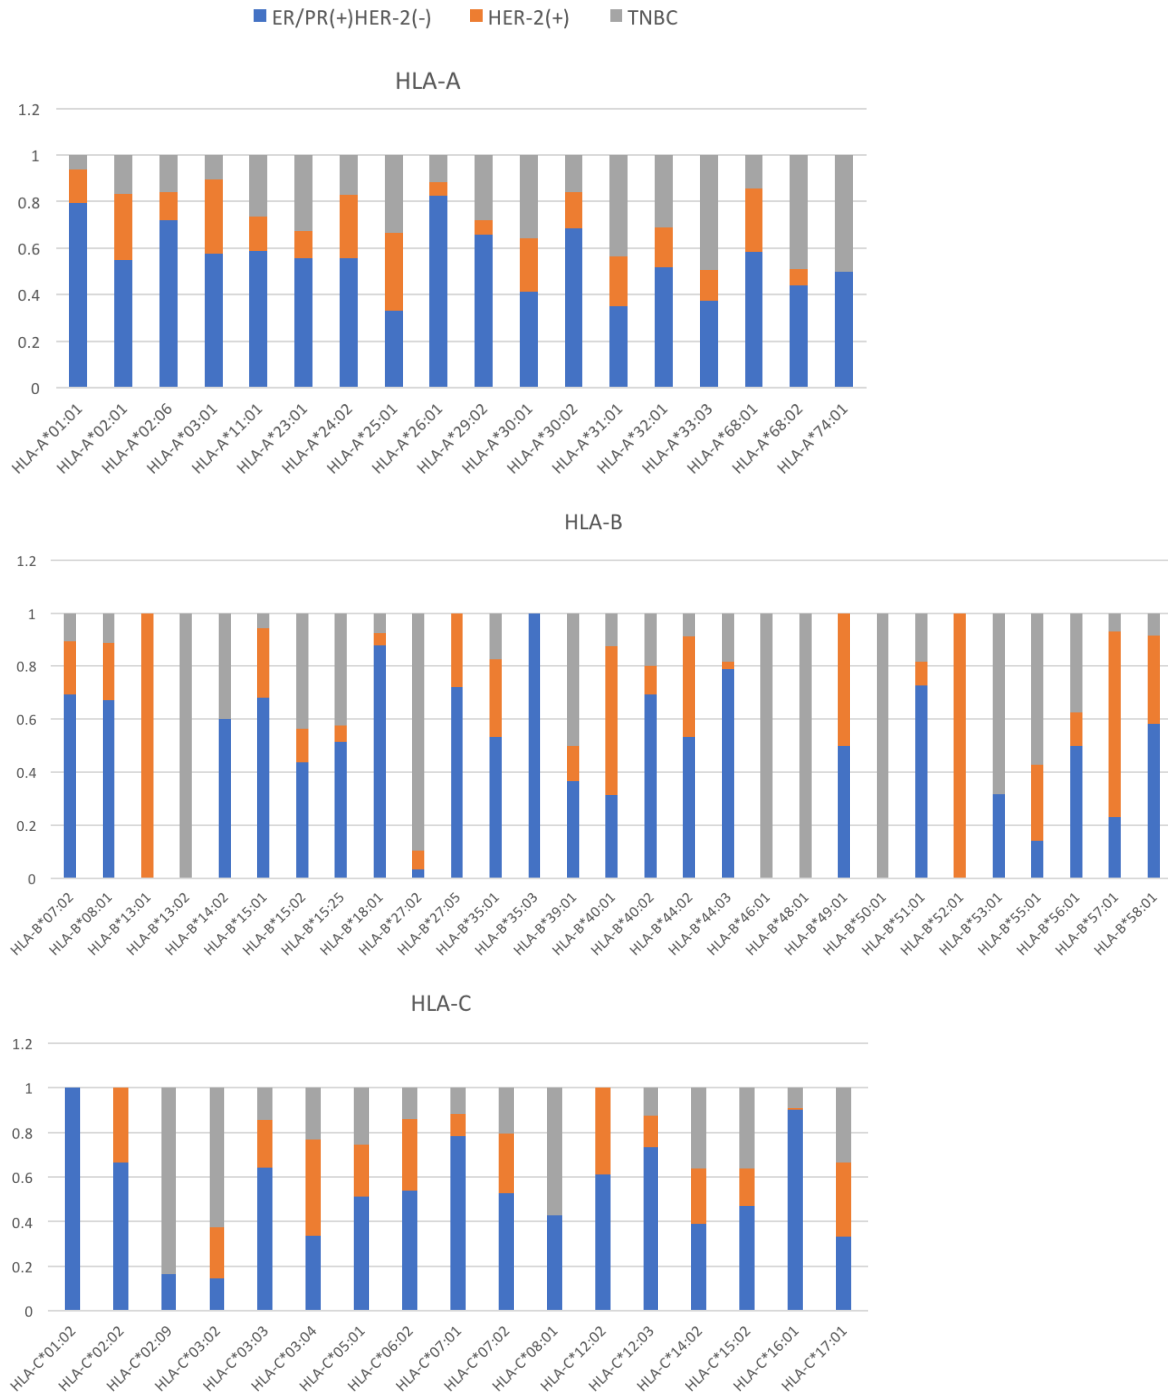

Supplement: MOESM11 [file 16524488]
