# Supplementary material for: The neoepitope landscape of breast cancer: implications for immunotherapy
Source: Springer Nature journal article supplement (doi:10.1186/s12885-019-5402-1), 2019-03-04

**Figure S11. Kaplan-Meier estimates based on mutation burden and total neopeptide load.** KS curves of (A) disease-free survival and (B) overall survival between cases with total Neopeptide Load (NEL) > Tumor Mutation Burden (TMB) and NEL < TMB in all three subtypes of breast cancer.

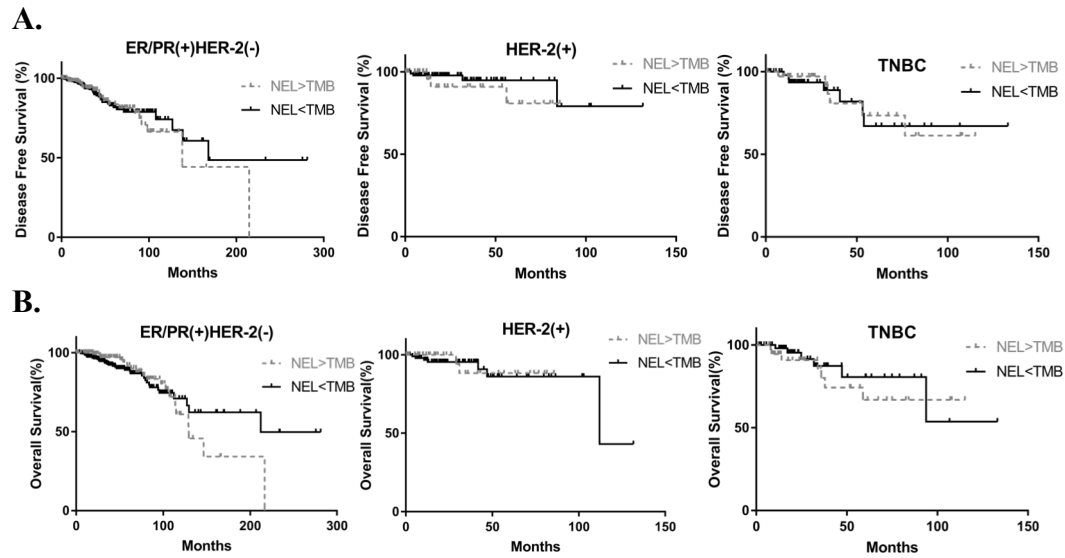

Supplement: MOESM14 [file 16524488]
